# Supplementary material for: Unique Growth Pattern Presentation of a Papillary Renal Cell Carcinoma
Source: MDPI journal article supplement (doi:10.3390/diagnostics12081904), 2022-08-06
Supplement: s1 [file s1]

Table S1. All genomic alterations detected in the histologically normal tissue.

| Gene   | Amino Acid Change | Coding                    | Variant ID | Locus          | Allele Frequency | Transcript     | Variant Effect            |
|--------|-------------------|---------------------------|------------|----------------|------------------|----------------|---------------------------|
| FGFR3  | p.(T651=)         | c.1953G>A                 | .          | chr4:1807894   | 99.85%           | NM_000142.4    | synonymous                |
| FGFR3  | p.(L706=)         | c.2118G>A                 | .          | chr4:1808360   | 4.80%            | NM_000142.4    | synonymous                |
| PDGFRA | p.(P567=)         | c.1701A>G                 | .          | chr4:55141055  | 88.20%           | NM_006206.6    | synonymous                |
| PDGFRA | p.([S566=;P567=]) | c.1698_1701delCCCAinsTCCG | .          | chr4:55141052  | 11.80%           | NM_006206.6    | synonymous,<br>synonymous |
| KIT    | p.(L644P)         | c.1931T>C                 | .          | chr4:55594228  | 25.96%           | NM_000222.3    | missense                  |
| KIT    | p.(R683Tfs*43)    | c.2047_2048insCC          | .          | chr4:55595557  | 93.33%           | NM_000222.3    | frameshift<br>Insertion   |
| KIT    | p.(R684G)         | c.2050A>G                 | .          | chr4:55595560  | 93.33%           | NM_000222.3    | missense                  |
| KDR    | p.(?)             | c.3849-2A>G               | .          | chr4:55946332  | 26.70%           | NM_002253.3    | unknown                   |
| APC    | p.(T1493=)        | c.4479G>A                 | .          | chr5:112175770 | 100.00%          | NM_000038.6    | synonymous                |
| EGFR   | p.(G575R)         | c.1723G>A                 | .          | chr7:55232973  | 42.57%           | NM_005228.5    | missense                  |
| EGFR   | p.(N808=)         | c.2424T>C                 | .          | chr7:55249126  | 3.05%            | NM_005228.5    | synonymous                |
| MET    | p.(T1011A)        | c.3031A>G                 | .          | chr7:116411992 | 3.83%            | NM_001127500.3 | missense                  |
| SMO    | p.(A643Dfs*134)   | c.1927_1928insAC          | .          | chr7:128851602 | 57.14%           | NM_005631.5    | frameshift<br>Insertion   |
| SMO    | p.(?)             | c.1936+1G>C               | .          | chr7:128851612 | 80.00%           | NM_005631.5    | unknown                   |
| BRAF   | p.(T470K)         | c.1409C>A                 | .          | chr7:140481399 | 100.00%          | NM_004333.6    | missense                  |
| FGFR1  | p.(D165=)         | c.495T>C                  | .          | chr8:38285916  | 33.33%           | NM_001174067.1 | synonymous                |
| GNAQ   | p.(D236G)         | c.707A>G                  | .          | chr9:80409407  | 3.20%            | NM_002072.5    | missense                  |
| RET    | p.(L769=)         | c.2307G>T                 | .          | chr10:43613843 | 73.33%           | NM_020975.6    | synonymous                |
| RET    | p.(P785L)         | c.2354C>T                 | .          | chr10:43613890 | 4.31%            | NM_020975.6    | missense                  |

|        |            |                     |            |                 |        |                |            |
|--------|------------|---------------------|------------|-----------------|--------|----------------|------------|
| PTEN   | p.(P246=)  | c.738G>A            | .          | chr10:89717713  | 15.49% | NM_000314.8    | synonymous |
| FGFR2  | p.(E368G)  | c.1103A>G           | .          | chr10:123274815 | 6.94%  | NM_000141.5    | missense   |
| HRAS   | p.(H27=)   | c.81T>C             | COSM249860 | chr11:534242    | 99.56% | NM_001130442.2 | synonymous |
| ATM    | p.(S333F)  | c.998C>T            | .          | chr11:108117787 | 25.49% | NM_000051.3    | missense   |
| ATM    | p.(I1688V) | c.5062A>G           | .          | chr11:108170497 | 4.50%  | NM_000051.3    | missense   |
| ATM    | p.(E2711Q) | c.8131G>C           | .          | chr11:108205816 | 85.71% | NM_000051.3    | missense   |
| PTPN11 | p.(I514=)  | c.1542C>T           | .          | chr12:112926922 | 3.30%  | NM_002834.5    | synonymous |
| CDH1   | p.(T66A)   | c.196A>G            | .          | chr16:68835605  | 8.70%  | NM_004360.5    | missense   |
| TP53   | p.(R282=)  | c.846G>A            | COSM44724  | chr17:7577092   | 1.35%  | NM_000546.5    | synonymous |
| TP53   | p.(P72R)   | c.215C>G            | .          | chr17:7579472   | 47.55% | NM_000546.5    | missense   |
| SMAD4  | p.(G145E)  | c.434G>A            | .          | chr18:48575674  | 95.56% | NM_005359.6    | missense   |
| SMAD4  | p.(L146R)  | c.436_437delTTinsAG | .          | chr18:48575676  | 95.65% | NM_005359.6    | missense   |
| SMAD4  | p.(L146G)  | c.436_437delTTinsGG | .          | chr18:48575676  | 4.35%  | NM_005359.6    | missense   |
| SMAD4  | p.(V333A)  | c.998T>C            | .          | chr18:48591835  | 11.65% | NM_005359.6    | missense   |
| SMAD4  | p.(G384=)  | c.1152C>A           | .          | chr18:48593401  | 47.37% | NM_005359.6    | synonymous |
| STK11  | p.(G276D)  | c.827G>A            | .          | chr19:1221304   | 5.01%  | NM_000455.5    | missense   |

Table S2. All genomic alterations detected in the tumor tissue.

| Gene   | Amino Acid Change | Coding                          | Variant ID | Locus          | Allele Frequency | Transcript  | Variant Effect          |
|--------|-------------------|---------------------------------|------------|----------------|------------------|-------------|-------------------------|
| PDGFRA | p.(R554G)         | c.1660A>G                       | .          | chr4:55141014  | 5.76%            | NM_006206.6 | missense                |
| PDGFRA | p.([S566N;P567=]) | c.1697_1701delGCCC<br>AinsACCCG | .          | chr4:55141051  | 7.01%            | NM_006206.6 | missense,<br>synonymous |
| PDGFRA | p.(P567=)         | c.1701A>G                       | .          | chr4:55141055  | 92.99%           | NM_006206.6 | synonymous              |
| PDGFRA | p.(R822G)         | c.2464C>G                       | .          | chr4:55152032  | 100.00%          | NM_006206.6 | missense                |
| KIT    | p.(?)             | c.1991-2_1991-delinsC.A         | .          | chr4:55595499  | 3.57%            | NM_000222.3 | unknown                 |
| KIT    | p.(?)             | c.1991-2_1991delinsCCC          | .          | chr4:55595499  | 96.43%           | NM_000222.3 | unknown                 |
| KIT    | p.(R683Tfs*43)    | c.2047_2048insCC                | .          | chr4:55595557  | 100.00%          | NM_000222.3 | frameshift<br>Insertion |
| KIT    | p.(R684G)         | c.2050A>G                       | .          | chr4:55595560  | 100.00%          | NM_000222.3 | missense                |
| KDR    | p.(P1345=)        | c.4035T>C                       | .          | chr4:55946144  | 3.30%            | NM_002253.3 | synonymous              |
| KDR    | p.(P479=)         | c.1437A>T                       | .          | chr4:55972953  | 25.00%           | NM_002253.3 | synonymous              |
| KDR    | p.(P479=)         | c.1437A>C                       | .          | chr4:55972953  | 75.00%           | NM_002253.3 | synonymous              |
| KDR    | p.(P479A)         | c.1435C>G                       | .          | chr4:55972955  | 28.57%           | NM_002253.3 | missense                |
| KDR    | p.(P479T)         | c.1435C>A                       | .          | chr4:55972955  | 71.43%           | NM_002253.3 | missense                |
| KDR    | p.(N478I)         | c.1433A>T                       | .          | chr4:55972957  | 100.00%          | NM_002253.3 | missense                |
| FBXW7  | p.(L594V)         | c.1780C>G                       | .          | chr4:153245411 | 66.67%           | NM_033632.3 | missense                |
| FBXW7  | p.(S462P)         | c.1384T>C                       | .          | chr4:153249394 | 4.31%            | NM_033632.3 | missense                |
| APC    | p.(L1342S)        | c.4025T>C                       | .          | chr5:112175316 | 6.25%            | NM_000038.6 | missense                |
| APC    | p.(L1342S)        | c.4025_4026delTAins<br>CG       | .          | chr5:112175316 | 93.75%           | NM_000038.6 | missense                |
| APC    | p.(L1488=)        | c.4464A>G                       | .          | chr5:112175755 | 100.00%          | NM_000038.6 | synonymous              |
| APC    | p.(A1492=)        | c.4476C>T                       | .          | chr5:112175767 | 99.75%           | NM_000038.6 | synonymous              |

|      |                   |                             |   |                 |         |                |                           |
|------|-------------------|-----------------------------|---|-----------------|---------|----------------|---------------------------|
| APC  | p.(T1493=)        | c.4479G>A                   | . | chr5:112175770  | 100.00% | NM_000038.6    | synonymous                |
| APC  | p.(P1497=)        | c.4491A>G                   | . | chr5:112175782  | 100.00% | NM_000038.6    | synonymous                |
| APC  | p.(S1504=)        | c.4512C>T                   | . | chr5:112175803  | 100.00% | NM_000038.6    | synonymous                |
| APC  | p.(A1508=)        | c.4524T>C                   | . | chr5:112175815  | 99.90%  | NM_000038.6    | synonymous                |
| APC  | p.(I1516=)        | c.4548A>T                   | . | chr5:112175839  | 100.00% | NM_000038.6    | synonymous                |
| APC  | p.(A1582P)        | c.4744G>C                   | . | chr5:112176035  | 98.84%  | NM_000038.6    | missense                  |
| MET  | p.(I816R)         | c.2447T>G                   | . | chr7:116403132  | 100.00% | NM_001127500.3 | missense                  |
| MET  | p.(H855Qfs*3)     | c.2564_2565insGCTG          | . | chr7:116403249  | 100.00% | NM_001127500.3 | frameshift<br>Insertion   |
| MET  | p.(M1247I)        | c.3741G>C                   | . | chr7:116423412  | 100.00% | NM_001127500.3 | missense                  |
| SMO  | p.(C217=)         | c.651C>T                    | . | chr7:128845157  | 3.85%   | NM_005631.5    | synonymous                |
| SMO  | p.(Q228*)         | c.682C>T                    | . | chr7:128845188  | 99.85%  | NM_005631.5    | nonsense                  |
| SMO  | p.(T644S)         | c.1931C>G                   | . | chr7:128851606  | 100.00% | NM_005631.5    | missense                  |
| SMO  | p.(P645del)       | c.1933_1935delCCA           | . | chr7:128851607  | 100.00% | NM_005631.5    | nonframeshift<br>Deletion |
| SMO  | p.(?)             | c.1936+1G>C                 | . | chr7:128851612  | 100.00% | NM_005631.5    | unknown                   |
| ABL1 | p.(W235*)         | c.705G>A                    | . | chr9:133738305  | 52.30%  | NM_005157.6    | nonsense                  |
| RET  | p.(L769=)         | c.2307G>T                   | . | chr10:43613843  | 100.00% | NM_020975.6    | synonymous                |
| PTEN | p.(V133A)         | c.398T>C                    | . | chr10:89692914  | 100.00% | NM_000314.8    | missense                  |
| ATM  | p.([D408E;L409N]) | c.1224_1227delTCTTinsGAAC   | . | chr11:108119818 | 13.51%  | NM_000051.3    | missense,<br>missense     |
| ATM  | p.(L409A)         | c.1225_1227delCTTin<br>sGCA | . | chr11:108119819 | 78.38%  | NM_000051.3    | missense                  |
| ATM  | p.(P862S)         | c.2584C>T                   | . | chr11:108138015 | 100.00% | NM_000051.3    | missense                  |
| ATM  | p.(S864=)         | c.2592T>C                   | . | chr11:108138023 | 33.33%  | NM_000051.3    | synonymous                |
| ATM  | p.(V3025L)        | c.9073G>T                   | . | chr11:108236137 | 100.00% | NM_000051.3    | missense                  |

|        |                   |                          |   |                 |         |                |                           |
|--------|-------------------|--------------------------|---|-----------------|---------|----------------|---------------------------|
| PTPN11 | p.(I494V)         | c.1480A>G                | . | chr12:112926860 | 7.85%   | NM_002834.5    | missense                  |
| FLT3   | p.(L610V)         | c.1828T>G                | . | chr13:28608228  | 9.80%   | NM_004119.3    | missense                  |
| FLT3   | p.([N609=;L610=]) | c.1827_1828delTTinsCC    | . | chr13:28608228  | 85.62%  | NM_004119.3    | synonymous,<br>synonymous |
| FLT3   | p.(N609T)         | c.1826A>C                | . | chr13:28608230  | 5.04%   | NM_004119.3    | missense                  |
| FLT3   | p.([E608D;N609Y]) | c.1824_1825delAAinsCT    | . | chr13:28608231  | 94.24%  | NM_004119.3    | missense,<br>missense     |
| FLT3   | p.(E608V)         | c.1823A>T                | . | chr13:28608233  | 10.39%  | NM_004119.3    | missense                  |
| FLT3   | p.(R607G)         | c.1819A>G                | . | chr13:28608237  | 100.00% | NM_004119.3    | missense                  |
| FLT3   | p.(F605C)         | c.1814T>G                | . | chr13:28608242  | 100.00% | NM_004119.3    | missense                  |
| FLT3   | p.(R437K)         | c.1310G>A                | . | chr13:28610180  | 85.71%  | NM_004119.3    | missense                  |
| FLT3   | p.(?)             | c.1310-2_1310-1delinsG.T | . | chr13:28610181  | 60.00%  | NM_004119.3    | unknown                   |
| FLT3   | p.(?)             | c.1310-2A>G              | . | chr13:28610182  | 40.00%  | NM_004119.3    | unknown                   |
| RBI    | p.(E554G)         | c.1661A>G                | . | chr13:48955545  | 10.95%  | NM_000321.2    | missense                  |
| RBI    | p.([Q689H;N690Y]) | c.2067_2068delGAinsTT    | . | chr13:49033930  | 93.10%  | NM_000321.2    | missense,<br>missense     |
| RBI    | p.([Q689R;N690Y]) | c.2066_2068delAGainsGTT  | . | chr13:49033929  | 5.17%   | NM_000321.2    | missense,<br>missense     |
| AKT1   | p.(P42S)          | c.124C>T                 | . | chr14:105246476 | 3.30%   | NM_001014431.2 | missense                  |
| CDH1   | p.(N93S)          | c.278A>G                 | . | chr16:68835687  | 14.83%  | NM_004360.5    | missense                  |
| TP53   | p.(S20P)          | c.58T>C                  | . | chr17:7579855   | 9.89%   | NM_000546.5    | missense                  |
| TP53   | p.(F19C)          | c.56T>G                  | . | chr17:7579857   | 100.00% | NM_000546.5    | missense                  |
| ERBB2  | p.(V794M)         | c.2380G>A                | . | chr17:37881051  | 4.85%   | NM_004448.3    | missense                  |
| ERBB2  | p.(D880Mfs*31)    | c.2638delG               | . | chr17:37881445  | 100.00% | NM_004448.3    | frameshift<br>Deletion    |
| ERBB2  | p.(D880E)         | c.2640T>G                | . | chr17:37881448  | 100.00% | NM_004448.3    | missense                  |

|       |                   |                     |   |                |         |             |                         |
|-------|-------------------|---------------------|---|----------------|---------|-------------|-------------------------|
| ERBB2 | p.(G882C)         | c.2644G>T           | . | chr17:37881452 | 60.87%  | NM_004448.3 | missense                |
| SMAD4 | p.(W99R)          | c.295T>A            | . | chr18:48575101 | 100.00% | NM_005359.6 | missense                |
| SMAD4 | p.([1326=;A327S]) | c.978_979delTGinsCT | . | chr18:48591815 | 100.00% | NM_005359.6 | synonymous,<br>missense |
| SMAD4 | p.(Y328H)         | c.982T>C            | . | chr18:48591819 | 100.00% | NM_005359.6 | missense                |
| SMAD4 | p.(H444L)         | c.1331A>T           | . | chr18:48603030 | 77.78%  | NM_005359.6 | missense                |
| SMAD4 | p.(R445=)         | c.1335A>C           | . | chr18:48603034 | 70.00%  | NM_005359.6 | synonymous              |
| SMAD4 | p.(R445=)         | c.1335A>G           | . | chr18:48603034 | 20.00%  | NM_005359.6 | synonymous              |
| STK11 | p.(E33K)          | c.97G>A             | . | chr19:1207009  | 3.15%   | NM_000455.5 | missense                |
